# Supplementary material for: Physical Health-Related Quality of Life Improves over Time in Post-COVID-19 Patients: An Exploratory Prospective Study
Source: MDPI journal article supplement (doi:10.3390/jcm12124077), 2023-06-15
Supplement: s1 [file s1]

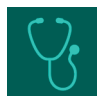

Article

# Physical Health-Related Quality of Life Improves over Time in Post-COVID-19 Patients: An Exploratory Prospective Study— Supplementary Materials

Stefan Malesevic <sup>1,2</sup>, Noriane A Sievi <sup>2</sup>, Dörthe Schmidt <sup>3</sup>, Florence Vallelan <sup>4</sup>, Ilijas Jelcic <sup>5</sup>, Malcolm Kohler <sup>2</sup>  
and Christian F Clarenbach <sup>2,\*</sup>

<sup>1</sup> Faculty of Medicine, University of Zurich, 8006 Zurich, Switzerland; stefan.malesevic@usz.ch

<sup>2</sup> Department of Pulmonology, University Hospital Zurich, 8091 Zurich, Switzerland

<sup>3</sup> Department of Cardiology, University Hospital Zurich, 8091 Zurich, Switzerland

<sup>4</sup> Department of Internal Medicine, University Hospital Zurich, 8091 Zurich, Switzerland

<sup>5</sup> Department of Neurology, University Hospital Zurich, 8091 Zurich, Switzerland

\* Correspondence: christian.clarenbach@usz.ch

**Citation:** Malesevic, S.; Sievi, N.A.;

Schmidt, D.; Vallelan, F.; Jelcic, I.;

Kohler, M.; Clarenbach, C.F.

Physical Health-Related Quality of

Life Improves over Time in

Post-COVID-19 Patients: An

Exploratory Prospective Study. *J.*

*Clin. Med.* **2023**, *12*, 4077.

<https://doi.org/10.3390/jcm12124077>

Academic Editors: César Fernández

De Las Peñas and Domingo

Palacios-Ceña

Received: 4 May 2023

Revised: 12 June 2023

Accepted: 13 June 2023

Published: 15 June 2023

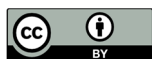

**Copyright:** © 2023 by the authors.

Licensee MDPI, Basel, Switzerland.

This article is an open access article

distributed under the terms and

conditions of the Creative Commons

Attribution (CC BY) license

(<https://creativecommons.org/licenses/by/4.0/>).

**Table S1.** Prevalence of Post-COVID-19 symptoms.

| Symptom                                                         | n (%)     |
|-----------------------------------------------------------------|-----------|
| Fatigue                                                         | 52 (75.4) |
| Dyspnea                                                         | 41 (59.4) |
| Concentration difficulties                                      | 39 (56.5) |
| Performance intolerance                                         | 38 (55.1) |
| Thoracic pain                                                   | 35 (50.7) |
| Headache                                                        | 30 (43.5) |
| Smell alteration                                                | 22 (31.9) |
| Dizziness                                                       | 21 (30.4) |
| Sleeping difficulties                                           | 18 (26.1) |
| Muscle weakness                                                 | 18 (26.1) |
| Palpitations                                                    | 18 (26.1) |
| Cough                                                           | 16 (23.2) |
| Muscle pain                                                     | 15 (21.7) |
| Taste alteration                                                | 12 (17.4) |
| Memory difficulties                                             | 12 (17.4) |
| Gastrointestinal symptoms (either nausea, vomiting or diarrhea) | 12 (17.4) |
| Weight gain                                                     | 11 (15.9) |
| Weight loss                                                     | 10 (14.5) |
| Sputum production                                               | 6 (8.7)   |
| Temperature                                                     | 5 (7.2)   |
| Reflux                                                          | 4 (5.8)   |
| Joint pain                                                      | 3 (4.3)   |
| Orthopnea                                                       | 3 (4.3)   |
| Tingling paresthesia                                            | 3 (4.3)   |
| Swallowing difficulties                                         | 2 (2.9)   |
| Postexertional malaise                                          | 2 (2.9)   |
| Hair loss                                                       | 1 (1.4)   |

**Table S2.** Effect of COVID-19 vaccine on Post-COVID-19 symptoms.

| COVID-19 Vaccine                                                                | N (%)          |
|---------------------------------------------------------------------------------|----------------|
| Received vaccination after initial SARS-CoV-2 infection                         | 67 (97.1)      |
| Moderna                                                                         | 47 (70.1)      |
| Pfizer                                                                          | 19 (28.4)      |
| Unknown                                                                         | 1 (1.5)        |
| 1 vaccination                                                                   | 35 (50.7)      |
| 2 vaccinations                                                                  | 28 (40.6)      |
| 2 vaccinations + Booster vaccination                                            | 3 (4.4)        |
| Missing information about number of vaccinations                                | 3 (4.4)        |
| Days from symptom onset of acute COVID-19 until first vaccination, median (IQR) | 192 (147, 242) |
| Effect on Long-Covid symptoms                                                   |                |
| Improvement                                                                     | 34 (50.7)      |
| Persistent improvement                                                          | 27 (40.3)      |
| Weeks until improvement, median (IQR)                                           | 2 (1, 4)       |
| Worsening                                                                       | 18 (26.9)      |
| Persistent worsening                                                            | 15 (22.4)      |
| Weeks until worsening, median (IQR)                                             | 1 (1, 4)       |
| Whether improvement nor worsening                                               | 20 (29.9)      |

Values are n (%) unless otherwise stated. Multiple selection of answers was possible.

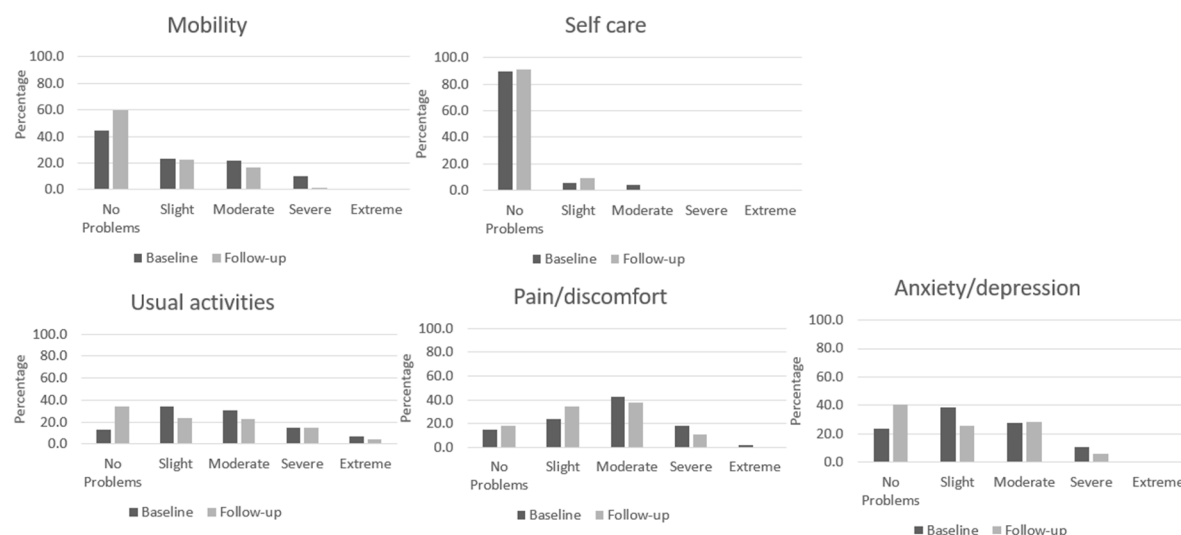

**Figure S1.** EQ-5D-5L dimensions responses at baseline and follow-up. Figure represents dimension responses as percentages of patients for the health dimensions mobility, self-care, usual activities, pain/discomfort and anxiety/depression of the Euroqol-5D-5L questionnaire (EQ-5D-5L). Response possibilities were “no problems”, “slight problems”, “moderate problems”, “severe problems” and “extreme problems”. The proportion of patients with the level “no problems” increases in all health dimensions.
